# Supplementary material for: Asymmetric recognition of HIV-1 Envelope trimer by V1V2 loop-targeting antibodies
Source: eLife journal article supplement (doi:10.7554/elife.27389), 2017-05-26
Supplement: supp [file elife-27389-supp-v1.zip]

Archive with 9 entries (9 files):
- elife_poa_e27389_Figure_5_figure_supplement_1.pdf
- elife_poa_e27389_Figure_4_figure_supplement_1.pdf
- elife_poa_e27389_Video_1.mov
- elife_poa_e27389_Figure_1_figure_supplement_1.pdf
- elife_poa_e27389_Figure_2_source_data_1.xlsx
- elife_poa_e27389_Figure_5_source_data_1.xlsx
- elife_poa_e27389_Figure_3_figure_supplement_2.pdf
- elife_poa_e27389_Figure_3_figure_supplement_1.pdf
- elife_poa_e27389_Figure_2_figure_supplement_1.pdf
