# Supplementary material for: Asymmetric recognition of HIV-1 Envelope trimer by V1V2 loop-targeting antibodies
Source: eLife journal article supplement (doi:10.7554/elife.27389), 2017-05-26
Supplement: supp [file elife-27389-supp-v1.zip › elife_poa_e27389_Figure_2_source_data_1.xlsx]

## Sheet: MNR Tables
			VRC01			PG9			PG16
	Virus	Clade	IgG	Fab	MNR	IgG	Fab	MNR	IgG	Fab	MNR
	6535.3	B	6.9	40	5.7971	4.1	170	41.4634	285	1800	6.31579
	QH0692.42	B	7.5	14	1.86667
	SC422661.8	B	0.62	2.3	3.70968	20	220	11	120	850	7.08333
	PVO.4	B	4.4	10	2.27273	80	500	6.25	89.5	260	2.90503
	TRO.11	B	2.4	12	5	240	1900	7.91667	19.4	390	20.1031
	AC10.0.29	B	5.8	16	2.75862	0.53	5.4	10.1887	0.22	1.2	5.45455
	REJO4541.67	B	0.21	1	4.7619	0.13	7.5	57.6923	0.11	26	236.364
	TRJO4551.58	B	0.62	1.6	2.58065	3.9	200	51.2821	25.5	240	9.41176
	WITO4160.33	B	0.41	2.3	5.60976	0.33	0.42	1.27273	0.095	0.51	5.36842
	CAAN5342.A2	B	5.8	16	2.75862	80	240	3	140	590	4.21429
	THRO4156.18	B	36	70	1.94444	270	1500	5.55556	85.5	2000	23.3918
	RHPA4259.7	B	0.27	1	3.7037	180	1500	8.33333	3.4	53	15.5882
	Du156.12	C	0.62	1.2	1.93548	0.33	2.8	8.48485	0.16	0.67	4.1875
	Du172.17	C				3.3	9.3	2.81818	0.41	2.6	6.34146
	Du422.1	C				2.9	7.1	2.44828	0.95	28	29.4737
	ZM197M.PB7	C	4.3	6.9	1.60465	6.7	13	1.9403	8.1	73	9.01235
	ZM214M.PL15	C	1.7	8.4	4.94118
	ZM233M.PB6	C	5.3	220	41.5094	0.23	0.2	0.869565	0.034	0.081	2.38235
	ZM249M.PL1	C	0.62	1.4	2.25806	1.4	0.99	0.707143	0.81	4.3	5.30864
	ZM53M.PB12	C	4.6	15	3.26087	0.4	3.9	9.75	0.25	1.1	4.4
	ZM109F.PB4	C	1.5	7.2	4.8	1	260	260
	ZM135M.PL10a	C	4.9	41	8.36735
	CAP45.2.00.G3	C				0.02	0.12	6	0.027	0.061	2.25926
	CAP210.2.00.E8	C				3.1	6.2	2	0.47	14	29.7872
	Q23.17	A	0.41	4.3	10.4878				0.014	0.2	14.2857
	Q842.d12	A	0.34	0.62	1.82353	0.2	1.3	6.5	0.18	0.63	3.5
	Q259.d2.17	A	0.69	110	159.42	1.5	0.99	0.66	0.068	19	279.412
	3718.v3.c11	A	2.5	130	52	0.47	2.9	6.17021	0.068	2.1	30.8824
	0330.v4.c3	A	0.41	1.2	2.92683	0.13	0.97	7.46154	0.14	0.69	4.92857
	3415.v1.c1	A	0.34	1	2.94118	0.53	1.8	3.39623	0.14	2.3	16.4286
	Geometric mean		1.55696	7.43001	4.77213	2.20916	13.2573	6.00109	1.01377	10.4871	10.3447
	Geometric std. dev.				3.05323			4.06436			3.41785
			BG1
	Virus	Clade	IgG	Fab	MNR
	C1080.c03	CRF01_AE	0.02	0.32	16
	WITO4160.33	B	0.0266667	0.24	9
	191955_A11	A (T/F)	0.0133333	0.16	12
	Q23.17	A	0.00666667	0.22	33
	AC10.0.29	B	0.0933333	1.2	12.8571
	Ce1176_A3	C (T/F)	0.14	15.48	110.571
	BG505/T332N	A	0.2	2.4	12
	X1193_c1	G	1.74667	8.5	4.86641
	CAP45.2.00.G3	C	0.62	3.76	6.06452
	6535.3	B	1.44	4.72	3.27778
	REJO4541.67	B	4.1	18.88	4.60488
	CNE5	CRF01_AE	2.66667	15.94	5.9775
	62357_14_D3_4589	B (T/F)	11.98	55.8	4.65776
	CNE52	BC	8.20667	53.58	6.52884
	3365.v2.c2	A	6.64667	113.08	17.013
	ZM249M.PL1	C	9.7	44.66	4.60412
	235-47	CRF02_AG	7.31333	59.44	8.12762
	1394C9G1(Rev-)	C (T/F)	18.4133	103.84	5.63939
	Ce704809221_1B3	C (T/F)	38.8867	264.56	6.80336
	CNE20	BC	19.7867	31.24	1.57884
	HIV-16055-2.3	C	39.6933	351.5	8.85539
	Geometric mean		1.21032	10.1889	8.41834
	Geometric std. dev.				2.40553
	Virus	Clade	3BNC60-62bp-3BNC60	3BNC60 Fab	MNR	3BNC60 IgG	3BNC60 Fab	MNR
	6535.3	B	0.24	27	112.5	4	27	6.75
	SC422661.8	B	0.02	1	50	0.3	1	3.33333
	PVO.4	B	0.01	1.3	130	0.1	1.3	13
	TRO.11	B	0.01	1.3	130	0.2	1.3	6.5
	TRJO4551.58	B	0.03	4.8	160
	CAAN5342.A2	B	0.16	6.2	38.75	3.6	6.2	1.72222
	THRO4156.18	B	0.43	23	53.4884	3.5	23	6.57143
	RHPA4259.7	B	0.007	1.5	214.286	0.3	1.5	5
	Du156.12	C	0.03	9.4	313.333	0.3	9.4	31.3333
	Du172.17	C	1	210	210	16	210	13.125
	ZM197M.PB7	C	0.11	15	136.364	3.8	15	3.94737
	ZM214M.PL15	C	0.07	6.9	98.5714	1.7	6.9	4.05882
	ZM233M.PB6	C	0.08	14	175	1.4	14	10
	ZM249M.PL1	C	0.01	2.7	270	0.3	2.7	9
	ZM53M.PB12	C	0.11	5.2	47.2727	1.3	5.2	4
	ZM109F.PB4	C	0.05	39	780	0.3	39	130
	ZM135M.PL10a	C	0.03	3.7	123.333	0.4	3.7	9.25
	Q842.d12	A	0.001	0.21	210	0.09	0.21	2.33333
	Q259.d2.17	A	0.007	3.7	528.571	0.03	3.7	123.333
	0330.v4.c3	A	0.007	0.62	88.5714	0.2	0.62	3.1
	3415.v1.c1	A	0.04	4.6	115	0.9	4.6	5.11111
	Geometric mean		0.0357449	5.05565	141.437	0.627494	5.06879	8.07783
	Geometric std. dev.				2.14395			3.16329
