# Supplementary material for: Asymmetric recognition of HIV-1 Envelope trimer by V1V2 loop-targeting antibodies
Source: eLife journal article supplement (doi:10.7554/elife.27389), 2017-05-26
Supplement: supp [file elife-27389-supp-v1.zip › elife_poa_e27389_Figure_5_figure_supplement_1.pdf]

# A

## Effects of residue 169<sub>gp120</sub> on neutralization

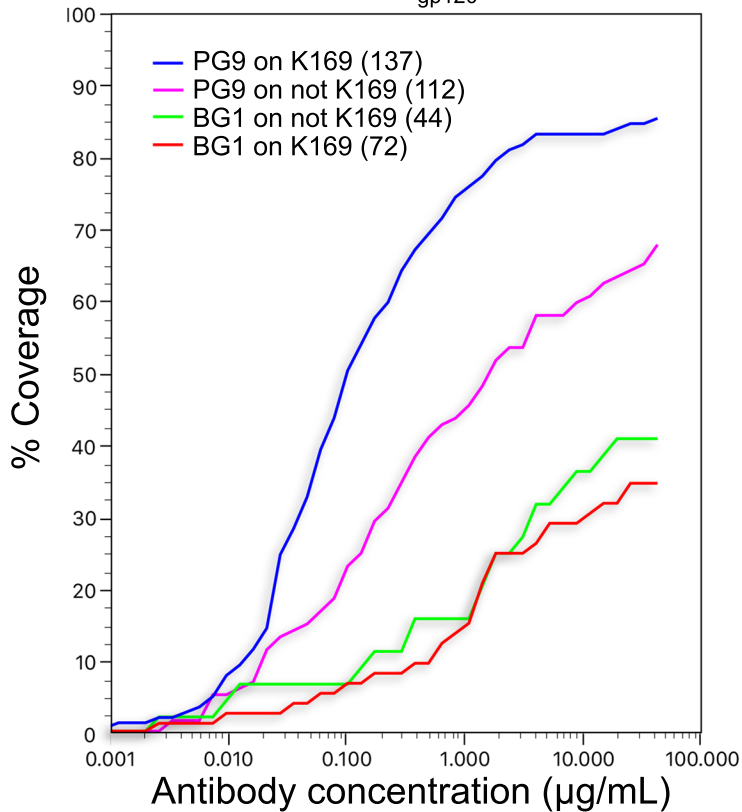

# B

## Effects of residue 132<sub>gp120</sub> on neutralization

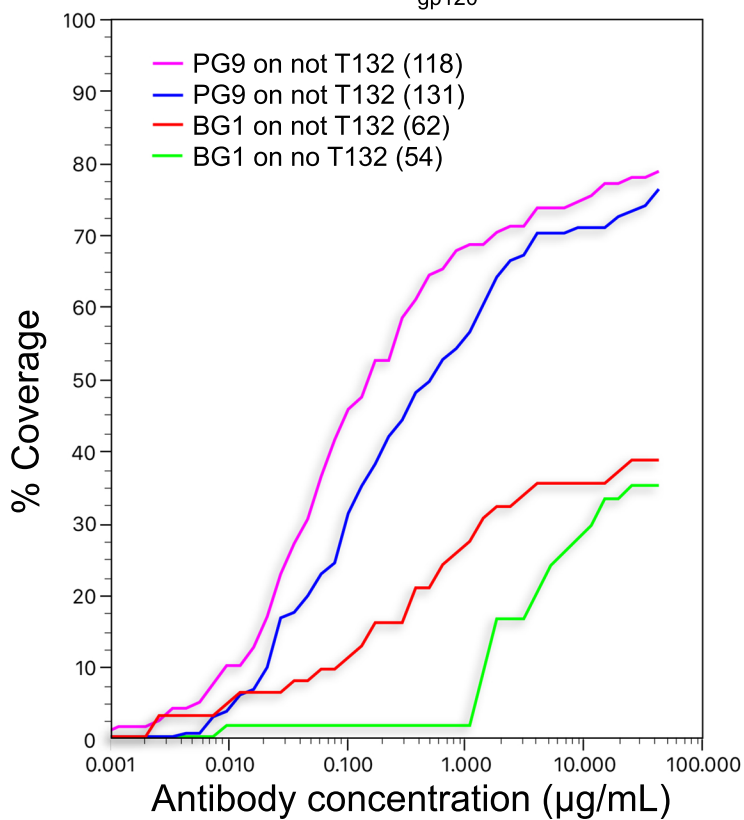

Figure 5 - figure supplement 1
