# Supplementary material for: Asymmetric recognition of HIV-1 Envelope trimer by V1V2 loop-targeting antibodies
Source: eLife journal article supplement (doi:10.7554/elife.27389), 2017-05-26
Supplement: supp [file elife-27389-supp-v1.zip › elife_poa_e27389_Figure_5_source_data_1.xlsx]

## Sheet: BG1
strain	BG1 IC50	PNGS 130
62357_14_D3_4589	0.638	+
RHPA4259_7	1.437	+
211_9	2.852	+
YU2	15.816	+				PNGS 130	BG1 mean IC50	Strain Count
C4118_9	22.788	+				+	25.7207	66
6480_V4_C25	>30	+				-	1.54491	52
0815_V3_C3	>30	+
191084_B7_19	>30	+
Q769_D22	>30	+
T257_31	>30	+
Q461_E2	>30	+
263_8	>30	+
9004SS_A3_4	>30	+
C2101_C1	>30	+
R2184_C4	>30	+
BJOX028000_10_3	>30	+
BJOX015000_11_5	>30	+
BJOX025000_01_1	>30	+
BJOX009000_02_4	>30	+
C3347_C11	>30	+
R1166_C1	>30	+
CNE8	>30	+
BJOX010000_06_2	>30	+
6240_08_TA5_4622	>30	+
PVO_4	>30	+
1054_07_TC4_1499	>30	+
CAAN5342	>30	+
1012_11_TC21_3257	>30	+
SC422661_8	>30	+
1006_11_C3_1601	>30	+
THRO4156	>30	+
6244_13_B5_4567	>30	+
TRO_11	>30	+
WEAU_D15_410	>30	+
QH0692	>30	+
TRJO4551_58	>30	+
SC05_8C11_2344	>30	+
ZM53_12	>30	+
ZM214_15	>30	+
DU172_17	>30	+
CE703010054_2A2	>30	+
CE0682_E4	>30	+
CE0393_C3	>30	+
6811_V7_C18	>30	+
7030102001E5(REV_)	>30	+
ZM197_7	>30	+
246F_C1G	>30	+
CAP210_E8	>30	+
CE2060_G9	>30	+
ZM109_4	>30	+
3301_V1_C24	>30	+
CE1086_B2	>30	+
ZM247V1(REV_)	>30	+
0013095_2_11	>30	+
BF1266_431A	>30	+
3103_V3_C10	>30	+
CE1172_H1	>30	+
89_F1_2_25	>30	+
231966_C2	>30	+
231965_C1	>30	+
6952_V1_C20	>30	+
191821_E6_1	>30	+
A07412M1_VRC12	>30	+
P1981_C5_3	>30	+
P0402_C2_11	>30	+
X2088_9	>30	+
C1080_C3	0.002	-
WITO4160_33	0.002	-
Q23_17	0.008	-
191955_A11	0.008	-
AC10_29	0.012	-
CE1176_A3	0.031	-
X1254_C3	0.048	-
X1632_S2_B10	0.079	-
X2131_C1_B5	0.116	-
X1193_C1	0.138	-
CAP45_G3	0.149	-
6535_3	0.322	-
REJO4541_67	0.342	-
CNE5	0.351	-
R3265_C6	0.611	-
620345_C1	0.626	-
CNE52	0.975	-
001428_2_42	1.094	-
ZM249_1	1.223	-
CNE19	1.267	-
235_47	1.275	-
1394C9G1(REV_)	1.279	-
CNE53	1.318	-
Q842_D12	1.395	-
249M_B10	1.473	-
MS208_A1	1.478	-
DU156_12	1.525	-
DU422	1.804	-
CE704809221_1B3	3.251	-
T251_18	3.591	-
T250_4	3.921	-
CNE20	4.264	-
16055_2_3	4.296	-
1056_10_TA11_1826	5.428	-
6041_V3_C23	6.745	-
3817_V2_C59	11.147	-
T255_34	11.589	-
3415_V1_C1	14.412	-
T278_50	19.313	-
Q259_17	>30	-
928_28	>30	-
6545_V4_C1	>30	-
6540_V4_C1	>30	-
16845_2_22	>30	-
CNE17	>30	-
ZM135_10A	>30	-
CNE21	>30	-
CE2010_F5	>30	-
ZM233_6	>30	-
CNE30	>30	-
CNE58	>30	-
3016_V5_C45	>30	-

## Sheet: PG9
strain	PG9 IC50	PNGS 130
Q769_H5	0.002	+
0921_V2_C14	0.003	+
TV1_29	0.007	+
Q769_D22	0.009	+				PNGS 130	PG9 mean IC50	Strain Count
KO756_38_TB12	0.01	+				+	0.756674	207
3988_25	0.013	+				-	0.244396	203
KER2008_12	0.015	+
CE0393_C3	0.015	+
DU151_2	0.018	+
191084_B7_19	0.018	+
CE703010054_2A2	0.02	+
CAP330_2_00_F2_41	0.02	+
CT966_E1_7	0.02	+
CAP220_2_00_A8_5B	0.02	+
CAP260_2_00_TA1_1B	0.02	+
CAP310_2_00_20_2	0.02	+
0013095_2_11	0.021	+
T257_31	0.022	+
BX08_16	0.023	+
3326_V4_C3	0.024	+
3589_V1_C4	0.025	+
ZM215_8	0.027	+
C2101_C1	0.028	+
6644_V2_C33	0.03	+
235080_3G7ENV2(REV_)	0.03	+
3426_V5_C17	0.03	+
BAL_26	0.033	+
BF1266_431A	0.034	+
9004SS_A3_4	0.036	+
C4118_9	0.038	+
CAP306_2_00_F9_1	0.04	+
21369737_G11_F2	0.04	+
CT184_D3_15	0.04	+
C3347_C11	0.041	+
CE2060_G9	0.048	+
ZM53_12	0.048	+
CE2052_G10	0.05	+
541_F1_A7_2	0.05	+
CE0626_E6	0.05	+
722_G4_16	0.05	+
231966_C2	0.052	+
93MW959	0.054	+
CAP301_2_00_C3_20	0.06	+
6980_V0_C31	0.06	+
ZM247V1(REV_)	0.063	+
CE1172_H1	0.074	+
DU123_6	0.076	+
286_36	0.083	+
CAP206_1_B5_Y681D	0.09	+
0077_V1_C16	0.092	+
Q168	0.096	+
211_9	0.097	+
2833264	0.1	+
57128_VRC15	0.107	+
CH0505_W4_3	0.11	+
CECAP200_B8A	0.11	+
CAP210_E8	0.119	+
CE0682_E4	0.12	+
M02138	0.122	+
T253_11	0.129	+
2759058_F10_B6	0.13	+
57128_02	0.136	+
7060101641A7(REV_)	0.14	+
19314479_A2_5	0.14	+
3545883_G1_E1	0.15	+
CE704810053_2B7	0.16	+
CNE55	0.164	+
CAP266_2_00_E9_H6	0.17	+
247	0.172	+
APV_6	0.181	+
1012_11_TC21_3257	0.182	+
ZM109_4	0.184	+
6146_V7_C23	0.19	+
CECAP210_TA5	0.22	+
6095_V1_C10	0.224	+
CAP341_2_00_C10_18	0.23	+
BJOX025000_01_1	0.235	+
R2184_C4	0.237	+
CNE10	0.239	+
2869751_A4_D3	0.24	+
1006_11_C3_1601	0.243	+
TZBD_02	0.247	+
DU172_17	0.252	+
92RW024	0.258	+
3603_C11_13	0.26	+
20915593	0.26	+
SS1196	0.261	+
3301_V1_C24	0.264	+
P1981_C5_3	0.264	+
19707346_E8_C6	0.28	+
263_8	0.296	+
CE704010083_B8	0.31	+
ADA	0.317	+
SO225_H11_12	0.32	+
KNH1209_18	0.326	+
BJOX010000_06_2	0.338	+
94UG103	0.34	+
TRJO4551_58	0.346	+
CT977_69_12	0.37	+
T280_5	0.379	+
P0402_C2_11	0.432	+
CE703010131_1E2	0.44	+
B005018_8_F6_3	0.45	+
ZM197_7	0.454	+
20417927_07	0.48	+
BJOX015000_11_5	0.494	+
CAP290_2_00_23_6	0.54	+
CNE8	0.567	+
89_F1_2_25	0.657	+
1245045	0.67	+
CAP291_2_00_H2_15	0.72	+
SC422661_8	0.726	+
KO224_T87_2_4	0.74	+
BJOX028000_10_3	0.762	+
SC05_8C11_2344	0.862	+
ZM55_28A	0.868	+
A07412M1_VRC12	0.93	+
CE0985_H7	1.03	+
CNE40	1.093	+
1107356_07	1.16	+
231965_C1	1.251	+
R1166_C1	1.332	+
CAP37_1_18_D2_19	1.35	+
25711_2_4	1.386	+
269_12	1.503	+
CNE7	1.531	+
BJOX009000_02_4	1.569	+
MW965_26	1.638	+
0260_V5_C36	1.676	+
6240_08_TA5_4622	1.793	+
CE703010228_1C4	1.97	+
CAP327_2_00_C6_37	2.19	+
CAP224_1_18_C7_3	2.19	+
Q461_E2	2.443	+
CE2103_E8	2.6	+
CAP323_2_00_B6_45	2.98	+
705010185	3.27	+
YU2	3.354	+
WEAU_D15_410	3.438	+
20803520	4.19	+
CAP258_2_00_X_23	5.71	+
PVO_4	7.697	+
93TH305	8.124	+
1143465_14	8.38	+
20721190	9.69	+
CE1086_B2	>10	+
CA146_H3_3	>10	+
246F_C1G	>10	+
346_F4_D2_12	>10	+
377_V4_C09	>10	+
SO607_B6_9	>10	+
CA392_H2_6	>10	+
CAP326_2_00_D9_2	>10	+
6022_V7_C24	>10	+
933_V4_C4	>10	+
556_F2_3_25	>10	+
20883229_C9_H6	>10	+
3873_V1_C24	>10	+
CAP40_2_01_A3_5	>10	+
CA457_H1_1	>10	+
7030102001E5(REV_)	>10	+
ZM214_15	>10	+
1811_B3_23	>10	+
KO426_T78_10	>10	+
CAP225_1_06_A2_18	>10	+
21197826_V1	>10	+
6471_V1_C16	>10	+
21492713_B11_E3	>10	+
20355851_20	>10	+
98_F4_H5_13	>10	+
KO459_T68_4	>10	+
CAP136_1_16_E6_1	>10	+
CAP269_2_00_F11_1	>10	+
CAAN5342	12.58	+
THRO4156	14.774	+
MN_3	17.1	+
191821_E6_1	17.627	+
RHPA4259_7	20.677	+
0815_V3_C3	>25	+
1054_07_TC4_1499	>25	+
QH0692	>25	+
62357_14_D3_4589	>25	+
6244_13_B5_4567	>25	+
6811_V7_C18	>25	+
6952_V1_C20	>25	+
X2088_9	>25	+
3103_V3_C10	28.004	+
TRO_11	32.308	+
APV_17	34.778	+
94KE105	37.875	+
94UG114	40.608	+
QH209_14M_A2	>50	+
0439_V5_C1	>50	+
CNE56	>50	+
CMU02	>50	+
89_6	>50	+
QH0515_1	>50	+
6101_10	>50	+
CNE12	>50	+
CNE57	>50	+
BL01	>50	+
96ZM651	>50	+
NKU3006_EC1	>50	+
A03349M1_VRC4A	>50	+
92UG001	>50	+
3337_V2_C6	>50	+
UG021_16	>50	+
CAP347_2_00_B1_1	0.001	-
0041_V3_C18	0.001	-
T250_4	0.001	-
KER2018_11	0.001	-
704010042	0.002	-
CT072_56_7	0.002	-
98IN022	0.003	-
C1080_C3	0.003	-
JRCSF	0.003	-
3817_V2_C59	0.004	-
Q23_17	0.005	-
CH070_1	0.006	-
92RW008	0.006	-
REJO4541_67	0.006	-
CAP45_G3	0.007	-
CH181_12	0.007	-
CH117_4	0.008	-
CE703010217_B6	0.009	-
CE1176_A3	0.009	-
Q842_D12	0.009	-
001428_2_42	0.01	-
234_F1_16_57	0.01	-
20286961_C1_H8	0.01	-
KO870_C2_10	0.01	-
CAP174_1_06_F3_1B	0.01	-
CAP317_2_00_D4_10	0.01	-
CE703010010_C4	0.01	-
19252094_A5_G2	0.01	-
6040_V4_C15	0.01	-
CAP304_2_00_F6_6	0.01	-
21261106_C12_H2	0.01	-
6838_V1_C35	0.011	-
16055_2_3	0.012	-
WITO4160_33	0.013	-
ZM233_6	0.014	-
CNE5	0.014	-
CNE19	0.014	-
0330_V4_C3	0.015	-
X2278_C2_B6	0.015	-
1394C9G1(REV_)	0.017	-
H086_8	0.017	-
CNE15	0.018	-
92UG037	0.019	-
T255_34	0.02	-
CAP237_1_22_B2_2_39	0.02	-
CAP308_2_00_E11_35	0.02	-
705010067	0.02	-
18814602_H8_F3	0.02	-
SO186_H6_5	0.02	-
304_F2_1_11	0.02	-
6785_V5_C14	0.021	-
T33_7	0.022	-
25925_2_22	0.023	-
246_F3_C10_2	0.024	-
CNE58	0.024	-
191955_A11	0.025	-
242_14	0.028	-
ME178_G6_16	0.03	-
CE704010069_C6	0.03	-
20198102_E9_G1	0.03	-
DU156_12	0.03	-
CNE52	0.032	-
6540_V4_C1	0.034	-
93IN905	0.035	-
25710_2_43	0.038	-
92BR025_9	0.038	-
CAP307_2_00_24_1	0.04	-
20104663_E11_D2	0.04	-
CAP129_1_15_B2_13	0.04	-
CAP340_2_00_B3_16	0.04	-
ZM249_1	0.04	-
249M_B10	0.047	-
3718_3_11	0.048	-
CNE20	0.049	-
92RW009	0.05	-
CE704809221_1B3	0.05	-
Q259_17	0.051	-
BG505	0.053	-
X1254_C3	0.056	-
92TH021	0.059	-
3365_V2_C20	0.06	-
2768732_C5_16	0.06	-
928_28	0.063	-
CNE21	0.063	-
BJOX002000_03_2	0.063	-
6545_V4_C1	0.066	-
CAP382_2_00_D7_19	0.07	-
19715820_A10_H2	0.07	-
CAP244_D3	0.073	-
AC10_29	0.076	-
CNE3	0.076	-
CT431_G6_6	0.08	-
MS208_A1	0.081	-
CNE59	0.085	-
271_11	0.089	-
CT810_G4_7	0.09	-
5768_4	0.091	-
X2131_C1_B5	0.094	-
CNE17	0.095	-
DJ263_8	0.098	-
21561324_D3_B5	0.1	-
CECAP177_1A3	0.1	-
92RW020	0.111	-
X1632_S2_B10	0.112	-
CT565_C7_48	0.12	-
1170887_08	0.12	-
3168_V4_C10	0.126	-
3728_V2_C6	0.13	-
CNE53	0.132	-
3415_V1_C1	0.138	-
KO243_H6_3	0.14	-
20358510_01	0.14	-
3312_D6_2	0.14	-
26191_2_48	0.14	-
X1193_C1	0.145	-
2865_A11_12	0.16	-
92RW026	0.164	-
6041_V3_C23	0.241	-
CECAP221_B14	0.28	-
HT593_1	0.282	-
ME067_A10_15	0.3	-
235_47	0.324	-
SO431_C1_1	0.34	-
21399975_E2_B3	0.34	-
6535_3	0.349	-
CAP363_2_00_10_3	0.36	-
3016_V5_C45	0.365	-
98CN009	0.371	-
CH119_10	0.387	-
DU422	0.39	-
R3265_C6	0.415	-
CT349_39_16	0.53	-
ZM106_9	0.55	-
CA327_D2_2	0.57	-
HXBC2	0.61	-
93RW029	0.69	-
CH038_12	0.746	-
T278_50	0.82	-
620345_C1	0.917	-
SO706_T10B_3	1.66	-
92UG046	1.861	-
3468_V1_C12	2.003	-
21283649	2.42	-
16845_2_22	2.923	-
288_38	3.007	-
CT140_140_B6	3.06	-
92UG024_2	3.477	-
CH0694_ENV	3.54	-
92UG031	3.605	-
398_F1_F6_20	>5	-
CAP69_1_12_TA7_1	7.83	-
1056_10_TA11_1826	7.89	-
CECAP188_1_D1_14(REV_)	8.37	-
SO405_T24_5	>10	-
21502011_F12_E2	>10	-
2891391_A2_E1	>10	-
20258279_V2	>10	-
CAP343_2_00_21_2	>10	-
B005582_7_G7_8	>10	-
20927783	>10	-
ZM135_10A	>10	-
CAP378_2_00_D2_5	>10	-
705010198	>10	-
CA240_A5_5	>10	-
CAP331_2_00_D7_39	>10	-
19157834_V1	>10	-
CAP292_2_00_12_4	>10	-
CT823_B6_1	>10	-
6322_V4_C1	>10	-
20965238	>10	-
CE2010_F5	>10	-
CT885_H3_2	>10	-
SO032_A2_8_1	>10	-
CAP332_2_00_C10_1	>10	-
2969249	>10	-
0984_V2_C2	>10	-
569_F1_37_10	>10	-
CE0665_F2	>10	-
21203310_G7_C3	>10	-
6631_V3_C10	>10	-
3514597	>10	-
CE0089_G2	>10	-
3637_V5_C3	>10	-
T266_60	11.696	-
CNE31	13.859	-
97ZA012	16.714	-
T251_18	>25	-
CNE30	>25	-
00836_2_5	49	-
93UG077	>50	-
SF162	>50	-
CNE14	>50	-
92BR020	>50	-
BG1168	>50	-
CNE4	>50	-
NL43	>50	-
APV_13	>50	-
7165_18	>50	-
JRFL	>50	-
98CN006	>50	-
16936_2_21	>50	-
6405_V4_C34	>50	-
92UG005	>50	-
