# Supplementary figures and images for: Asymmetric recognition of HIV-1 Envelope trimer by V1V2 loop-targeting antibodies
Source: eLife journal article supplement (doi:10.7554/elife.27389), 2017-05-26

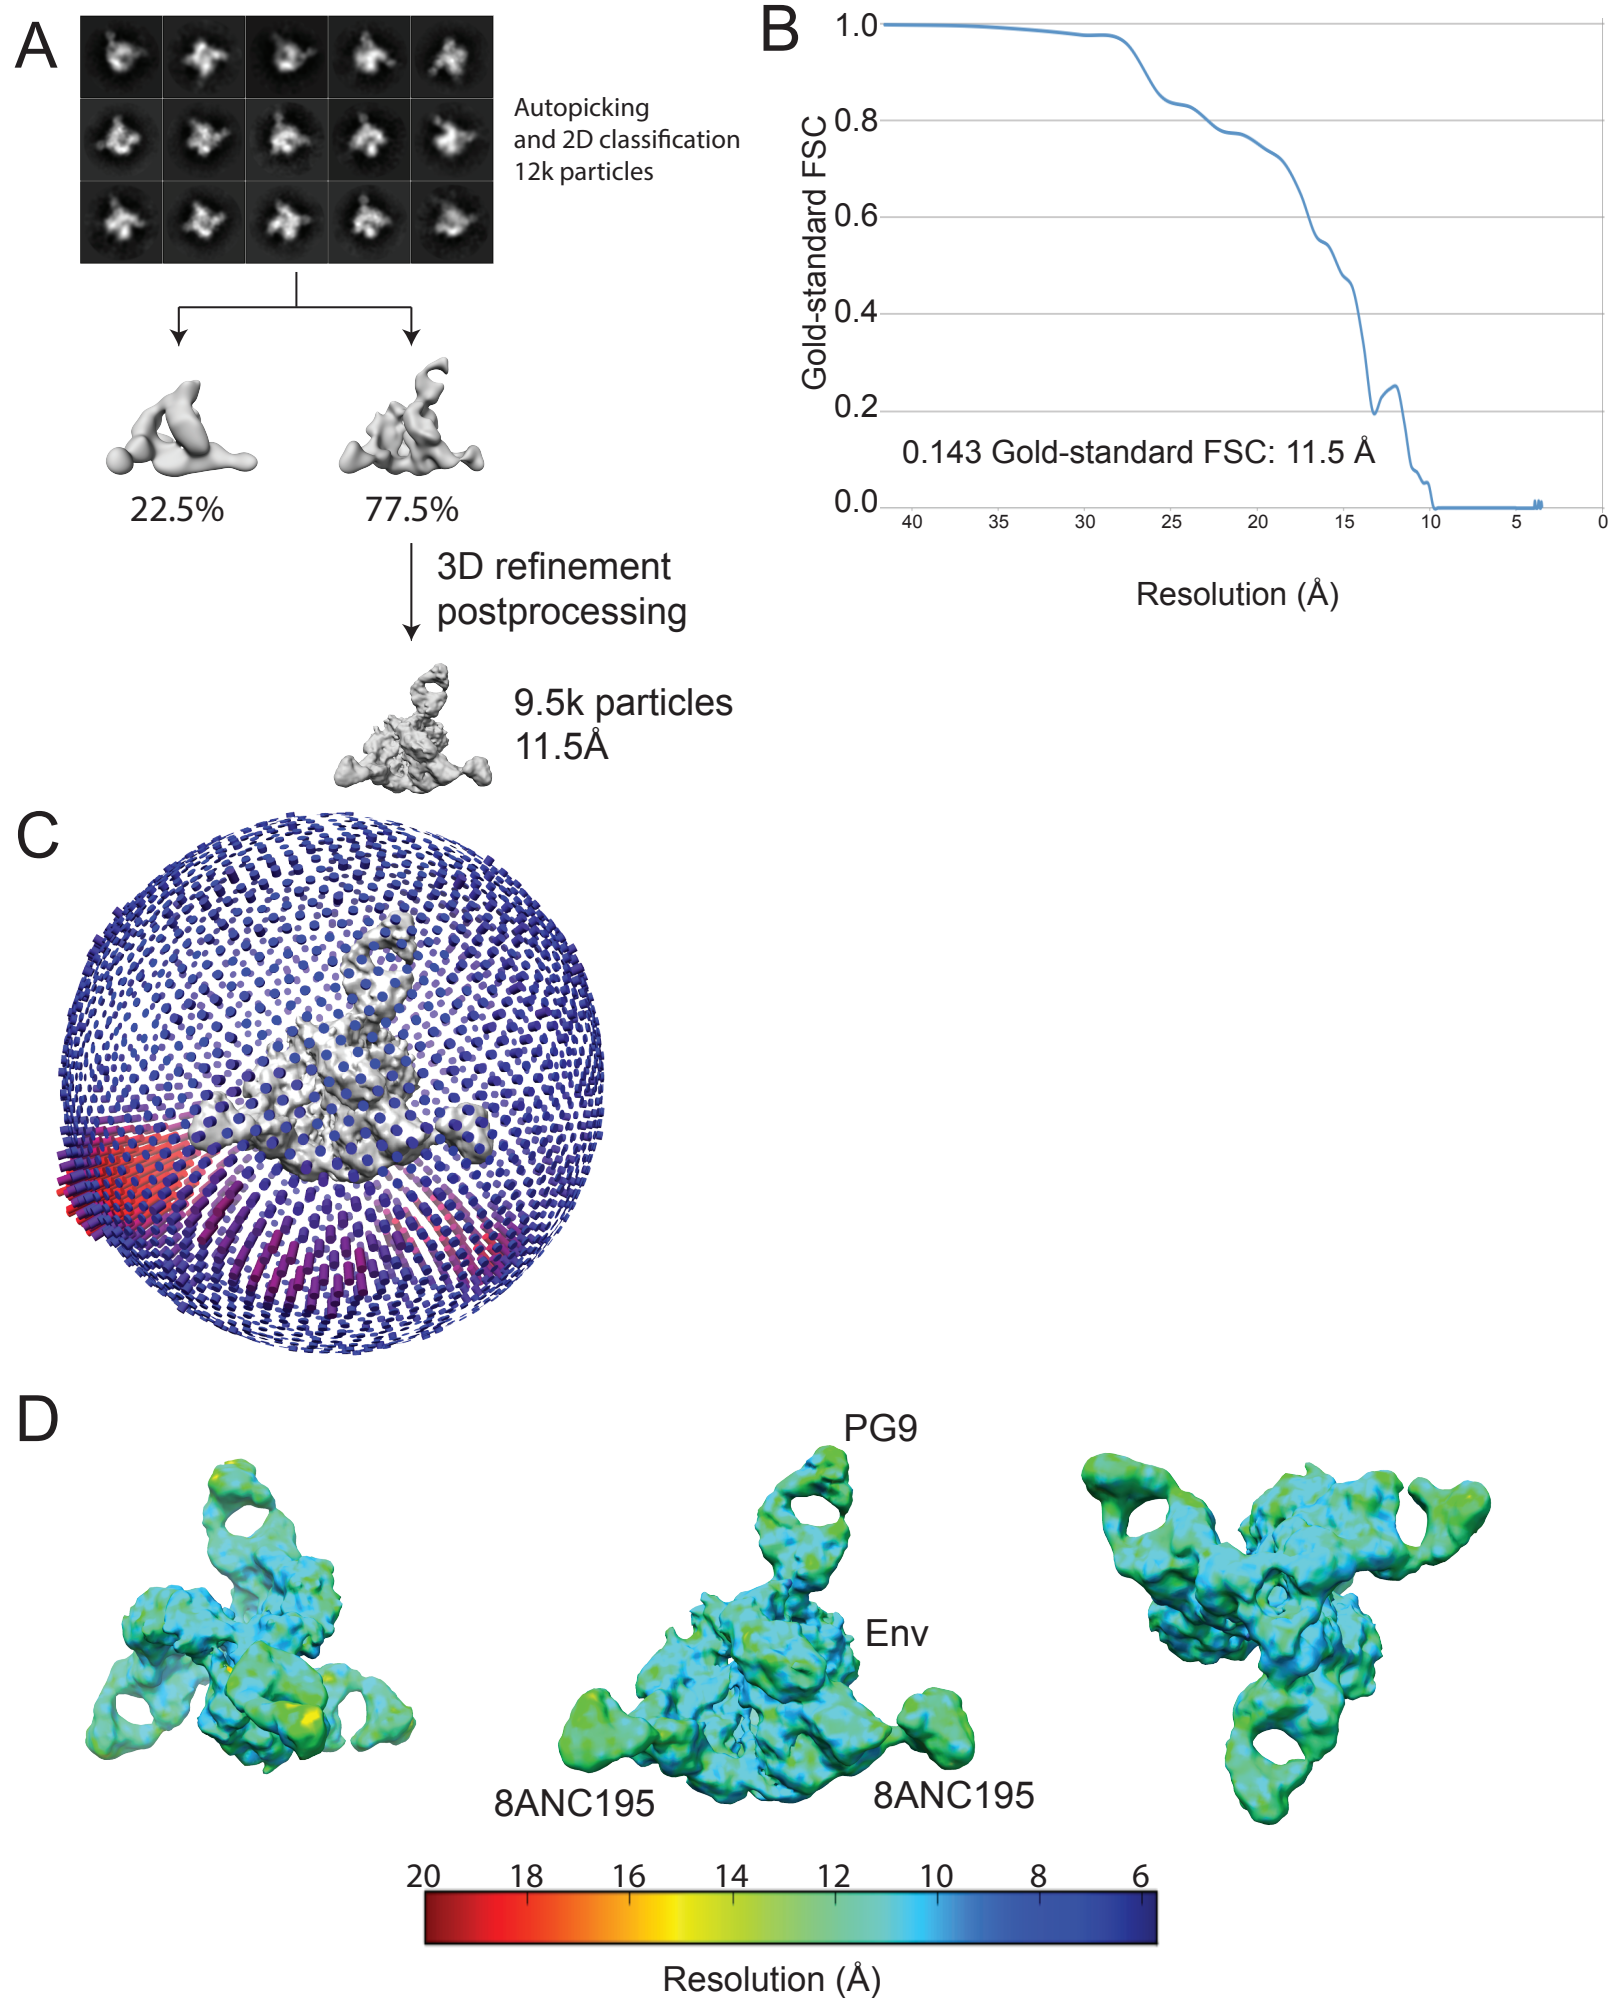

Figure 4 - figure supplement 1

Supplement: supp [file elife-27389-supp-v1.zip › elife_poa_e27389_Figure_4_figure_supplement_1.pdf]

A

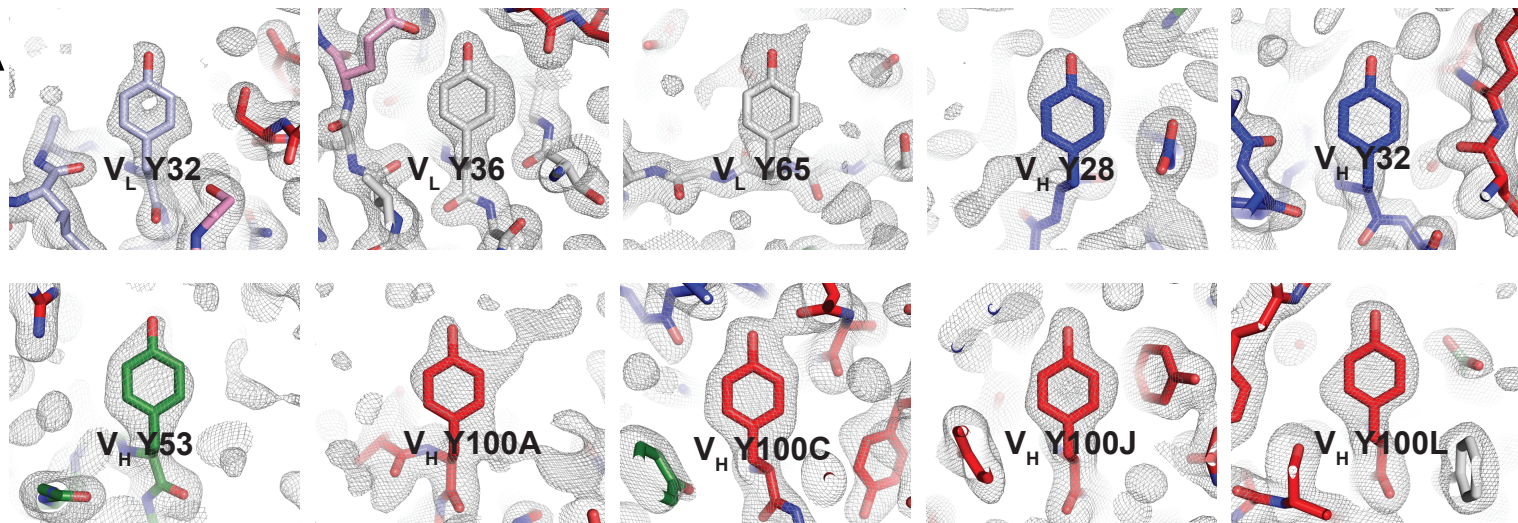

Figure 1 - figure supplement 1

Supplement: supp [file elife-27389-supp-v1.zip › elife_poa_e27389_Figure_1_figure_supplement_1.pdf]

## 2:1 BG1-Env structure

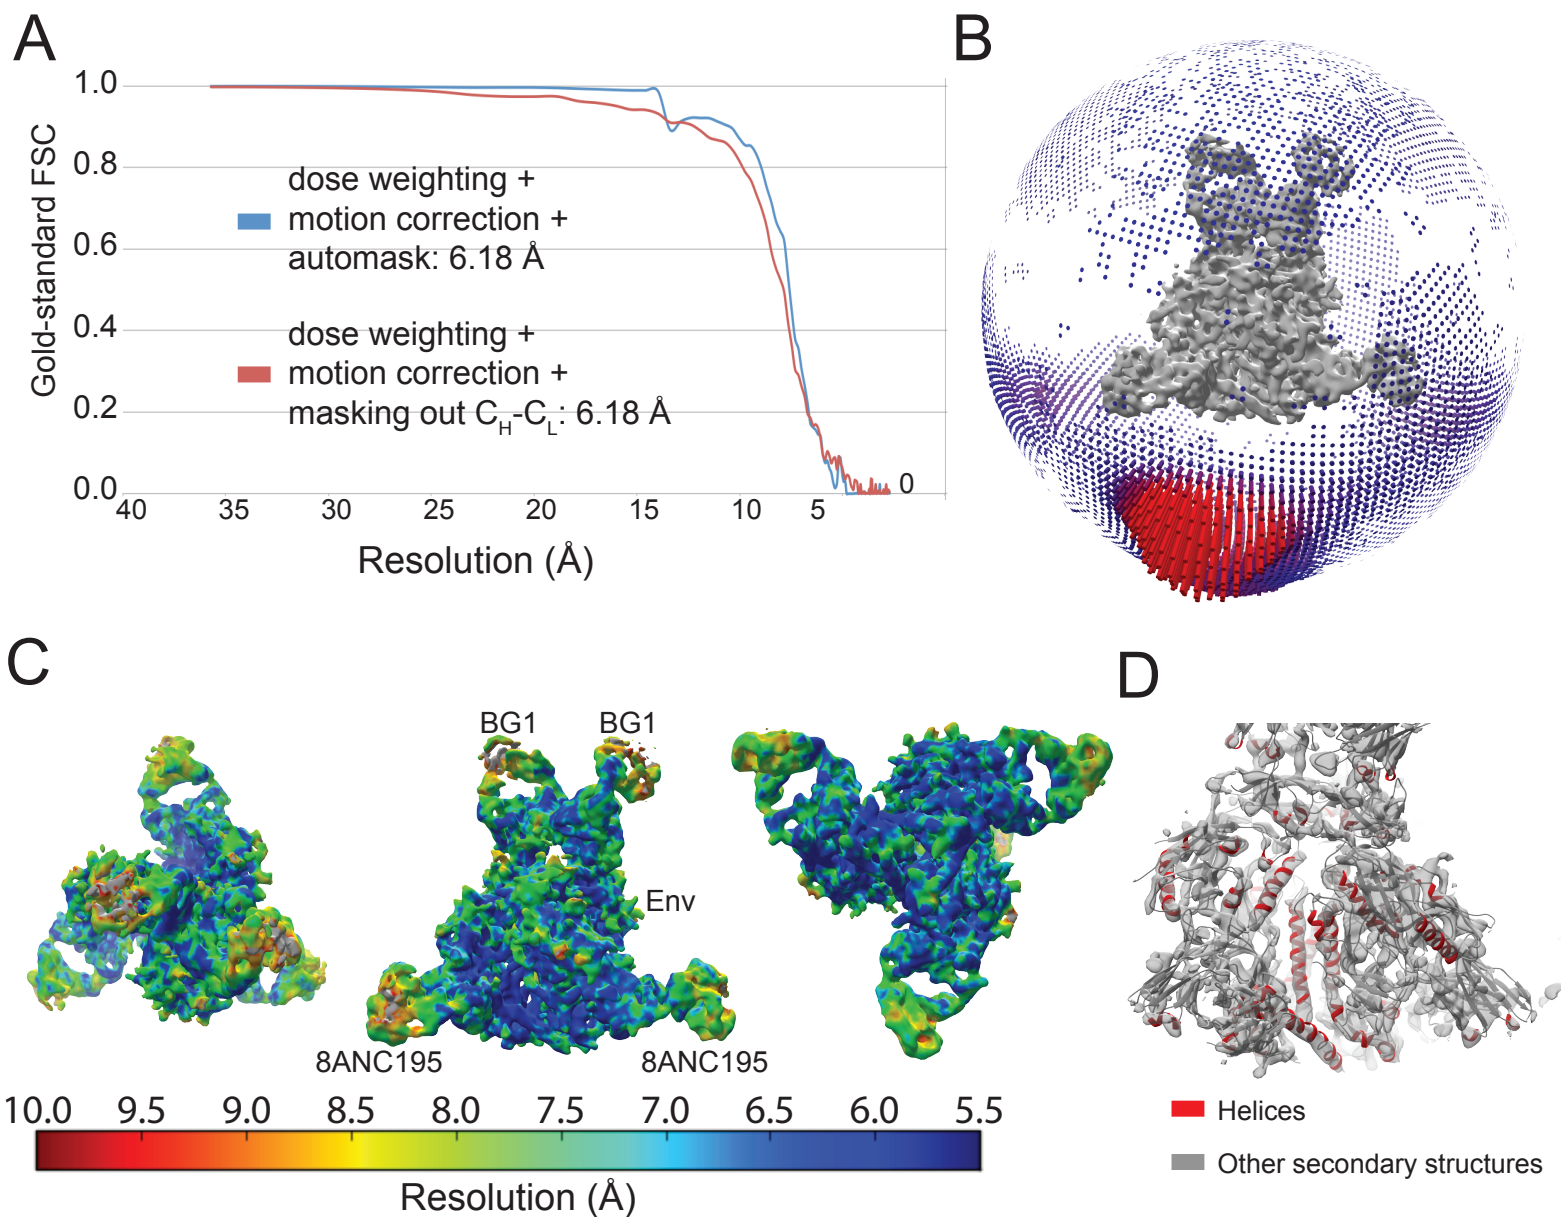

## 3:1 BG1-Env structure

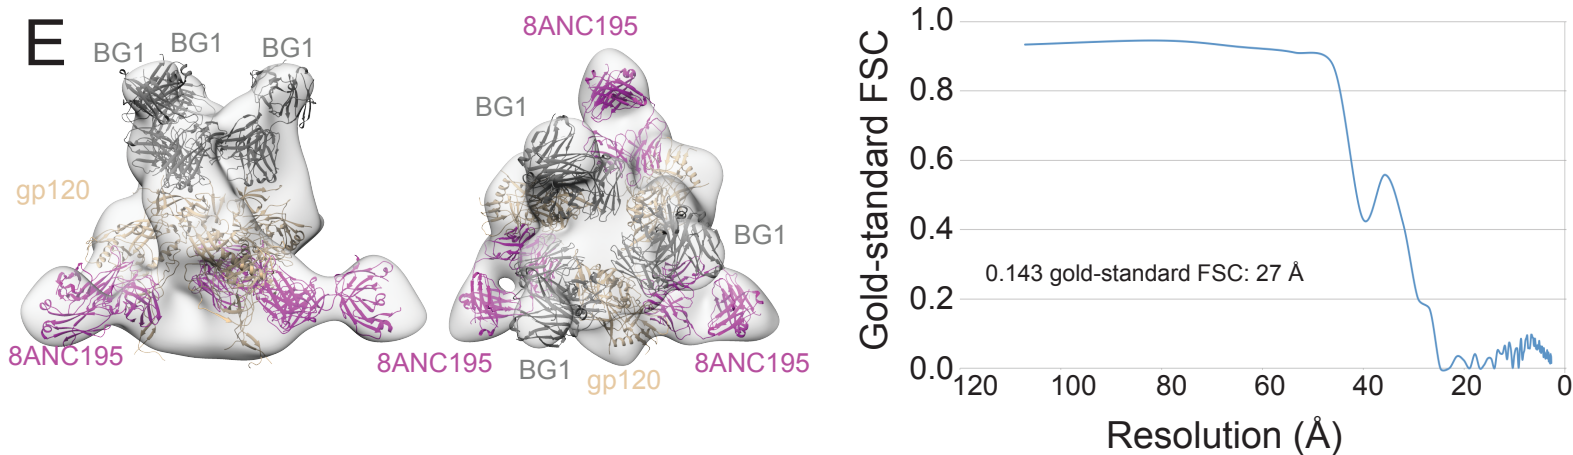

Supplement: supp [file elife-27389-supp-v1.zip › elife_poa_e27389_Figure_3_figure_supplement_2.pdf]

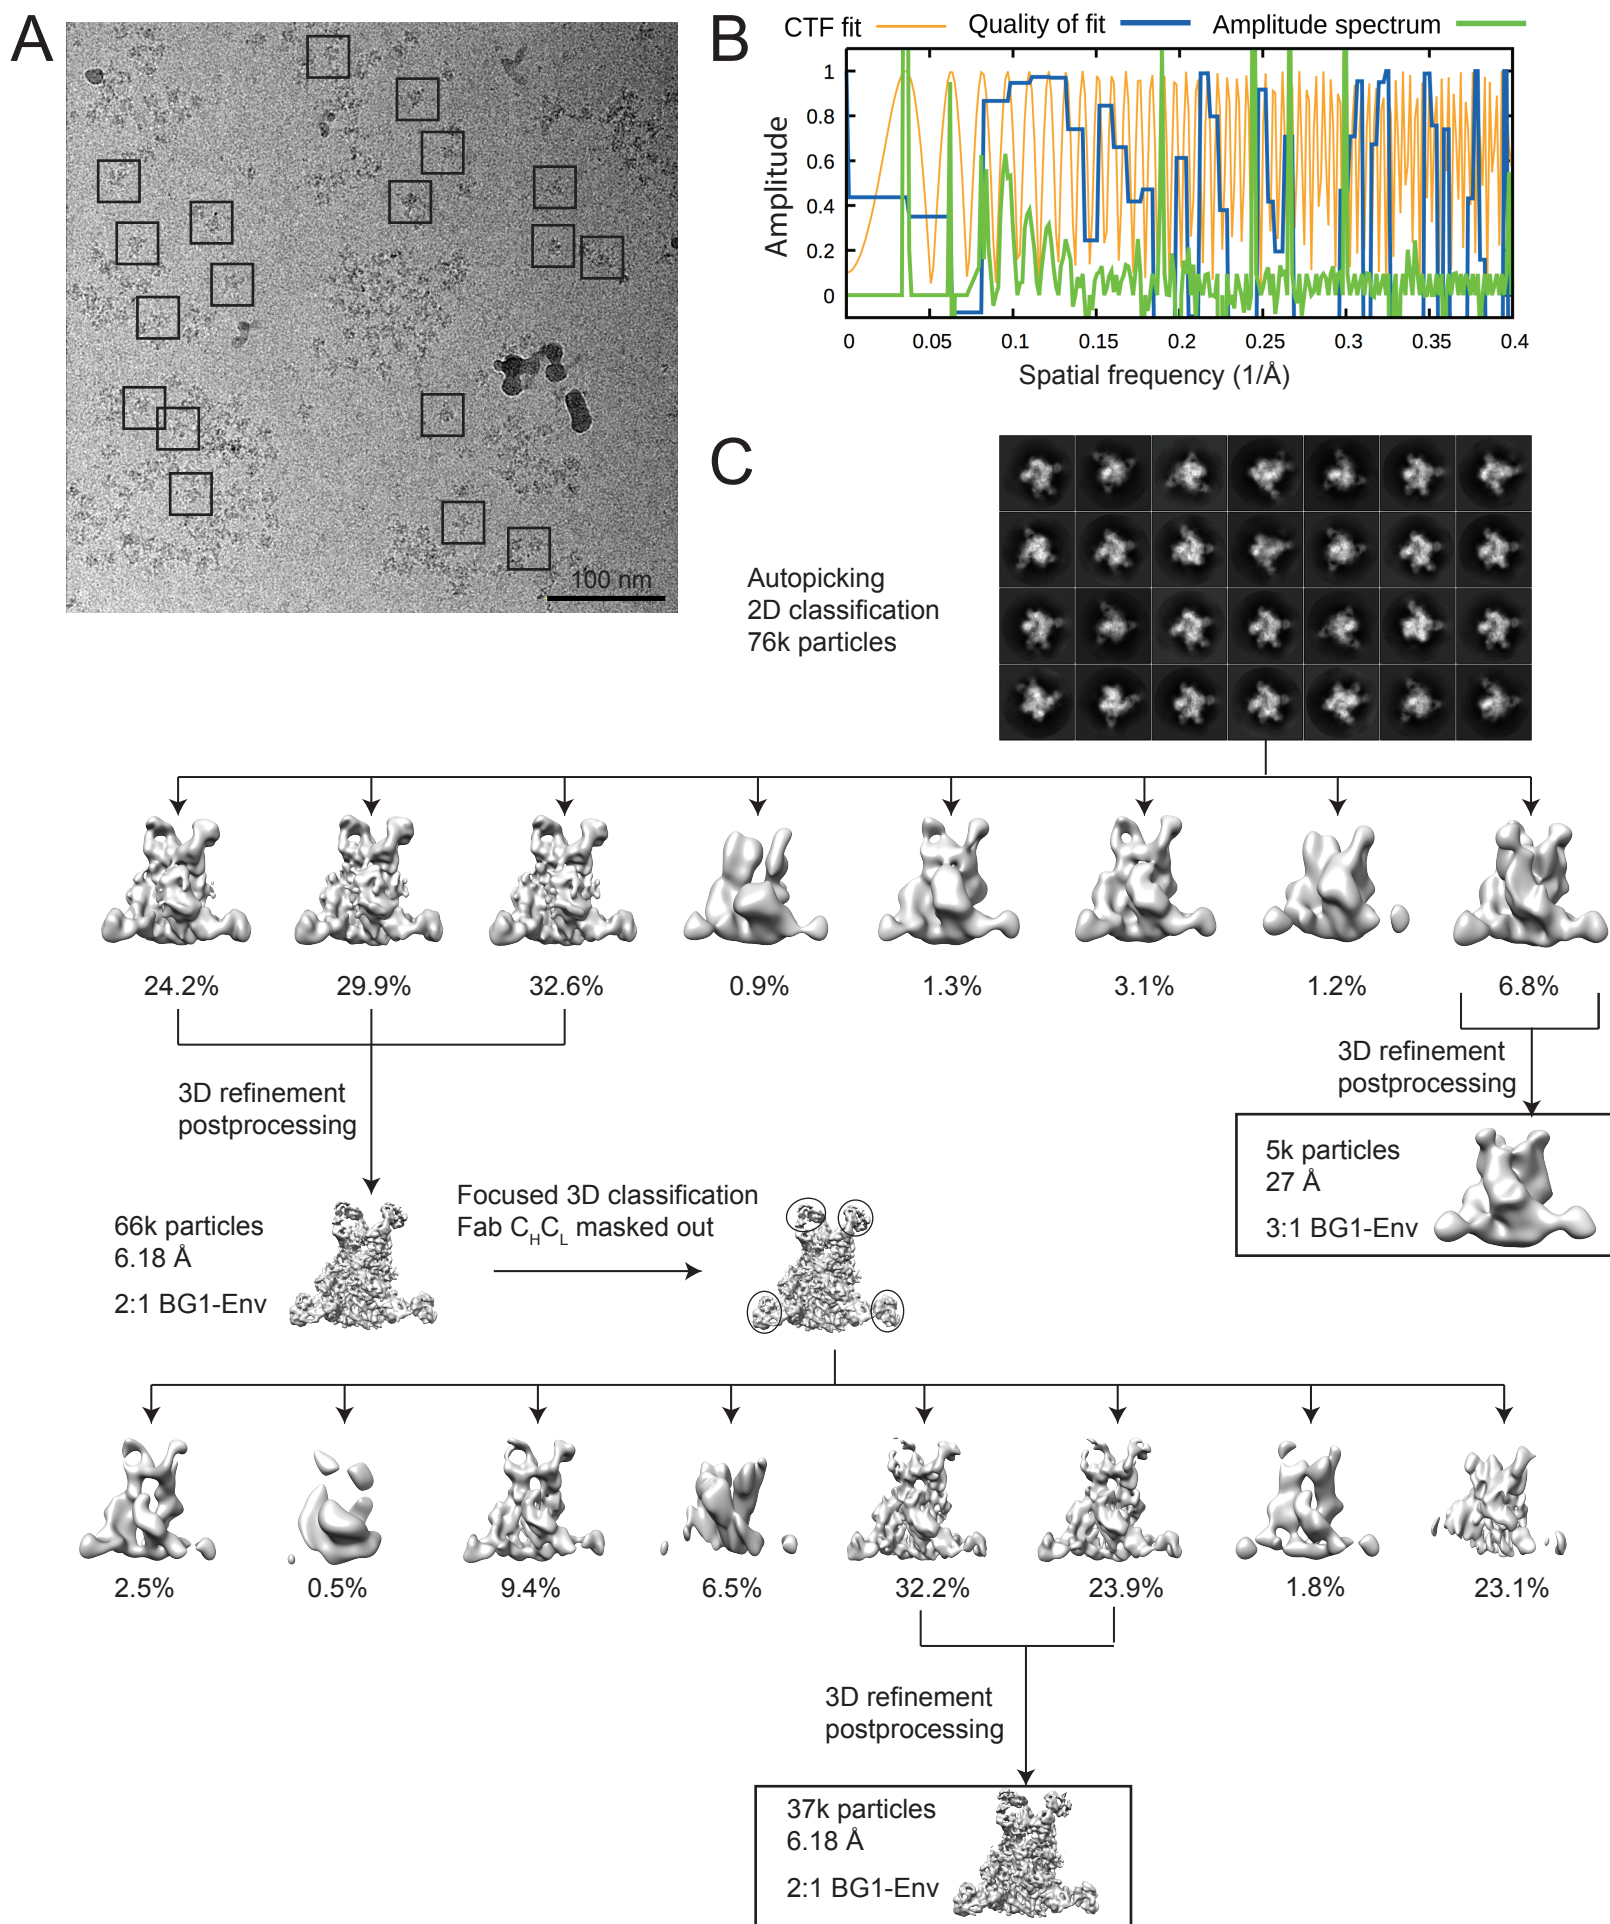

Figure 3 - figure supplement 1

Supplement: supp [file elife-27389-supp-v1.zip › elife_poa_e27389_Figure_3_figure_supplement_1.pdf]

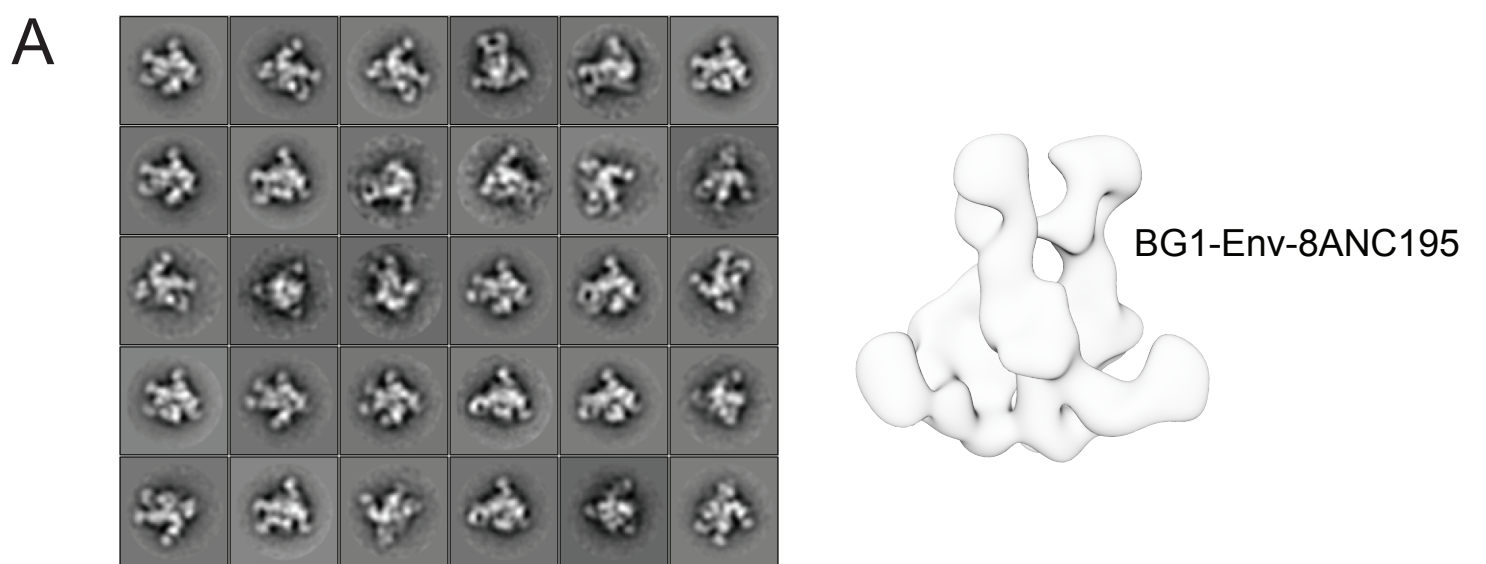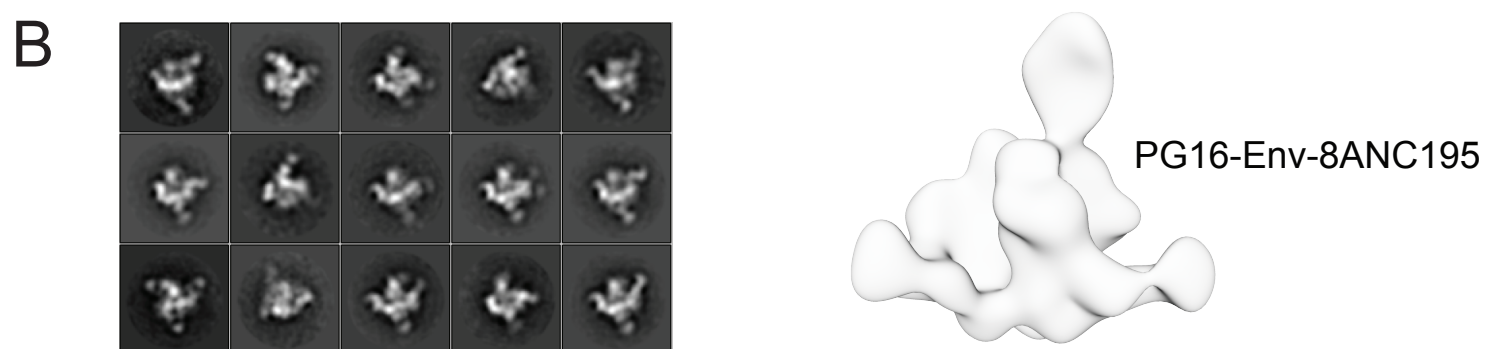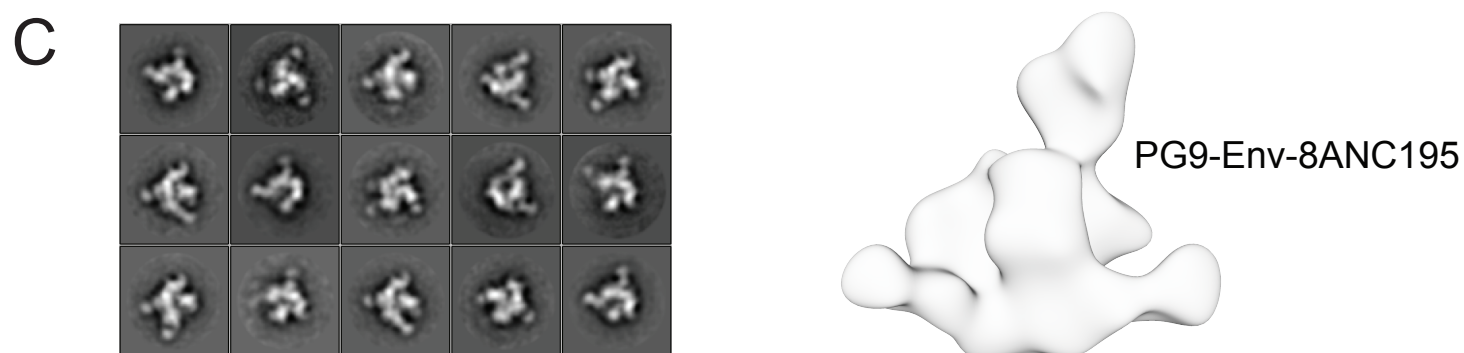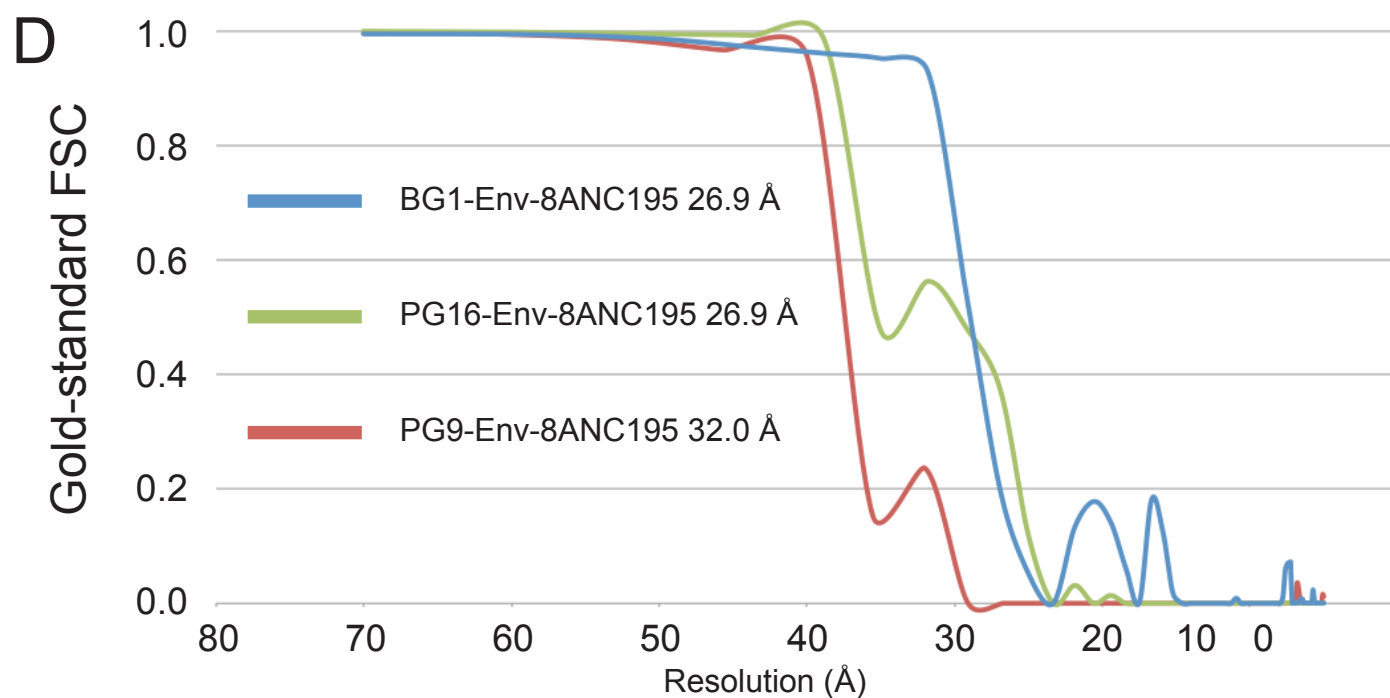

Figure 2 - figure supplement 1

Supplement: supp [file elife-27389-supp-v1.zip › elife_poa_e27389_Figure_2_figure_supplement_1.pdf]
